# Supplementary material for: DBZ (Danshensu Bingpian Zhi), a Novel Natural Compound Derivative, Attenuates Atherosclerosis in Apolipoprotein E–Deficient Mice
Source: PubMed Central journal article supplement — J Am Heart Assoc. 2017 Oct 2;6(10):e006297. doi: 10.1161/JAHA.117.006297 (PMC5721843; doi:10.1161/jaha.117.006297), 2017-10-02
Supplement: JAH3-6-e006297-s001.pdf [file JAH3-6-e006297-s001.pdf]

# **SUPPLEMENTAL MATERIAL**

**Table S1.** Sequences of Real-time PCR primers.

| <b>Target gene</b>   | <b>Accession number</b> | <b>Forward Primers (5 -3')</b> | <b>Reverse Primers (5 -3')</b> |
|----------------------|-------------------------|--------------------------------|--------------------------------|
| ABCA1                | NM_013454               | TCCTCATCCTCGTCATTCAAA          | GGACTTGGTAGGACGGAACCT          |
| ABCG1                | NM_009593               | TCACCCAGTTCTGCATCCTCTT         | GCAGATGTGTCAGGACCGAGT          |
| ABCG5                | NM_031884               | TGGATCCAACACCTCTATGCTAAA       | GGCAGGTTTTCTCGATGAACTG         |
| ABCG8                | NM_026180               | TGCCCACCTTCCACATGTC            | ATGAAGCCGGCAGTAAGGTAGA         |
| Arg-1                | NM_007482               | TGGCTTGCGAGACGTAGAC            | GCTCAGGTGAATCGGCCTTTT          |
| CD36                 | NM_001159558            | GGAAGTGTGGGCTCATTGC            | CATGAGAATGCCTCCAAACAC          |
| COX-2                | NM_011198               | TGCTGTACAAGCAGTGGCAA           | GCAGCCATTTCTTCTCTCC            |
| Cyclophilin          | NM_011149               | GGAGATGGCACAGGAGGAA            | GCCCGTAGTGCTTCAGCTT            |
| HMGC <sub>o</sub> AR | NM_008255               | CCGAATTGTATGTGGCACTG           | GGTGCACGTTCTTGAAGAT            |
| HMGC <sub>o</sub> AS | NM_008256               | GGTGGATGGGAAGCTGTCTA           | ACATCATCGAGGGTGAAAGG           |
| ICAM-1               | NM_010493               | AACCGCCAGAGAAAGATCAG           | TGTGACAGCCAGAGGAAGTG           |
| IL-6                 | NM_031168               | GAGGATACCACTCCCAACAGACC        | AAGTGCATCATCGTTGTTTCATACA      |
| LDLR                 | NM_001252659            | TCCAATCAATTCAGCTGTGG           | GAGCCATCTAGGCAATCTCG           |
| Mrc-1                | NM_008625               | ATGCCAAGTGGGAAAATCTG           | TGTAGCAGTGGCCTGCATAG           |
| NF- $\kappa$ B       | NM_008689               | GAACGATAACCTTTGCAGGC           | TTTCGATTCCGCTATGTGTG           |
| NPC1L1               | NM_207242               | TGGACTGGAAGGACCATTTCC          | GACAGGTGCCCCGTAGTCA            |
| TGF $\beta$          | NM_011577               | TTGCTTCAGCTCCACAGAGA           | TGGTTGTAGAGGGCAAGGAC           |
| SR-A                 | NM_031195               | CATGAACGAGAGGATGCTGACT         | GGAAGGGATGCTGTCATTGAA          |
| VCAM-1               | NM_011693               | CTTCATCCCCACCATTGAAG           | TGAGCAGGTCAGGTTACAG            |

**Table S2.** The basic echocardiography data after DBZ treatment for 10 weeks in each group at ApoE<sup>-/-</sup> 25 weeks mice.

|              | <b>Vehicle</b> | <b>Atorva</b> | <b>DBZ 20</b> | <b>DBZ 40</b> |
|--------------|----------------|---------------|---------------|---------------|
| LVID; d (mm) | 4.00±0.01      | 3.86±0.19     | 4.21±0.41     | 3.7±0.08      |
| LVID; s (mm) | 2.91±0.16      | 2.77±0.26     | 3.18±0.43     | 2.62±0.19     |
| LVPW; d (mm) | 0.66±0.01      | 0.67±0.01     | 0.67±0.01     | 0.64±0.03     |
| LVPW; s (mm) | 1.01±0.04      | 1.02±0.02     | 1.03±0.02     | 1.01±0.03     |
| LVAW; d (mm) | 0.66±0.01      | 0.67±0.01     | 0.67±0.01     | 0.67±0.01     |
| LVAW; s (mm) | 1.00±0.03      | 1.05±0.02     | 1.04±0.02     | 1.02±0.03     |
| EF (%)       | 53.58±3.38     | 55.08±6.46    | 49.73±5.26    | 56.70±5.44    |
| FS (%)       | 27.38±2.12     | 28.48±4.21    | 25.11±3.05    | 29.37±3.49    |

All values are means ± SEM (n=9/group), LVID; d, end-diastolic left ventricular internal dimension; LVID; s, end-systolic left ventricular internal dimension; LV mass, left ventricular mass; LVPW; d, end-diastolic left ventricular posterior wall; LVPW; s, end-systolic left ventricular posterior wall; LVAW; d, end-diastolic left ventricular anterior wall; LVAW; s, end-systolic left ventricular anterior wall; EF, ejection fraction; FS, fractional shortening.

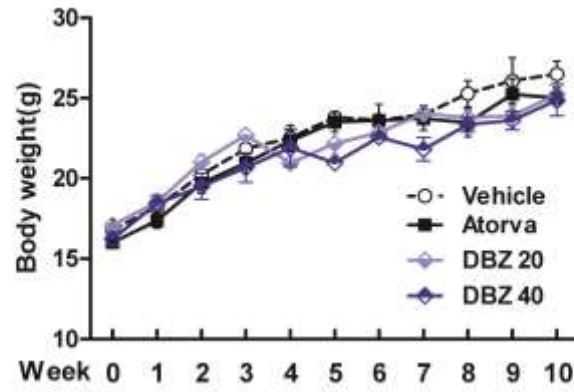

**Figure S1.** Comparisons of body weight resulting from different treatments in ApoE<sup>-/-</sup> mice fed a Western diet for 10 weeks. The results are presented as the means  $\pm$  SEM (n=9/group). Atorva, atorvastatin.

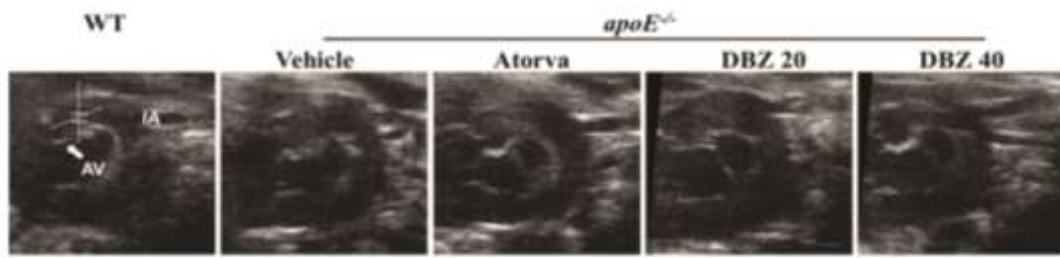

**Figure S2.** Representative *in vivo* ultrasound images show the long-axis view of the mouse ascending aorta and innominate artery (IA) in various groups. Peak diastolic flow velocity at the aortic valve (AV, indicated by arrows) was measured and quantified after outlining the Doppler signal. Atorva, atorvastatin.

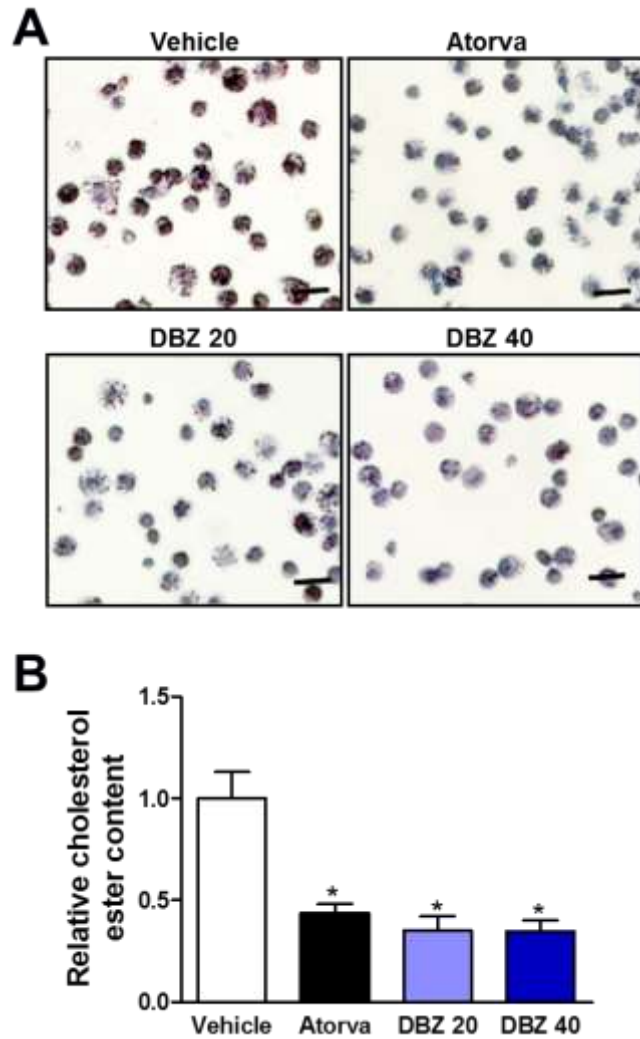

**Figure S3.** The primary peritoneal macrophages from 25-week-old ApoE<sup>-/-</sup> mice fed a Western diet for 20 weeks in each group. (A) Cells were cultured for 72 h in complete medium and subsequently stained with Oil Red O (scale: 50  $\mu$ m). (B) Relative intracellular cholesteryl ester levels were normalized to cellular protein content in peritoneal macrophages. Values are presented as the mean $\pm$ SEM (n=3/group) (\*P<0.05). Atorva, atorvastatin.

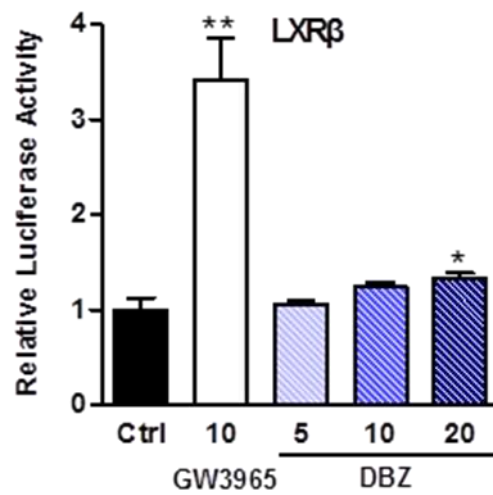

**Figure S4.** The transcriptional activity of LXR $\beta$  was assessed by the transactivation reporter assay in 293T cells. GW3965 was induced as a positive control. Values are presented as the mean  $\pm$  SEM of at least three experiments (\* $P$ <0.05 and \*\* $P$ <0.01). LXR $\beta$ , liver X receptor  $\beta$ .

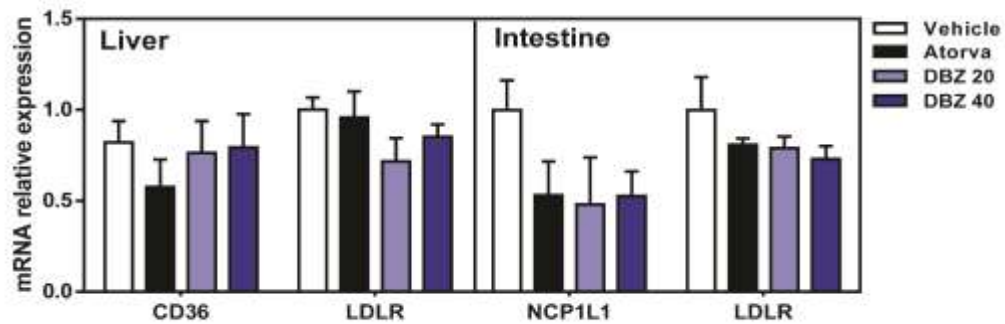

**Figure S5.** Hepatic and intestinal mRNA levels of genes involved in the transporter of cholesterol as determined by real-time PCR in the mice and normalized to cyclophilin in the mice as indicated in Figure 2 (n=6/group). Atorva, atorvastatin; CD36, cluster of differentiation 36; LDLR, low density lipoprotein receptor; NCP1L1, niemann-pick C 1-like 1.
